# Supplementary material
Source: PubMed Central journal article supplement (PMC3975655)

|                                 |        | ARIC  |                    |           | CARDIA |                    |           | JHS   |                    |           | MESA  |         |           |
|---------------------------------|--------|-------|--------------------|-----------|--------|--------------------|-----------|-------|--------------------|-----------|-------|---------|-----------|
| Initial n:                      | female | 1584  |                    |           | 503    |                    |           | 1141  |                    |           | 734   |         |           |
|                                 | male   | 932   |                    |           | 317    |                    |           | 751   |                    |           | 674   |         |           |
| Selection Criteria              |        |       |                    |           |        |                    |           |       |                    |           |       |         |           |
|                                 |        | total | unique/<br>removed | remaining | total  | unique/<br>removed | remaining | total | unique/<br>removed | remaining | total | removed | remaining |
| Chronic Respiratory Symptoms:   | female | 892   | 892                | 692       | 364    | 364                | 139       | 615   | 615                | 526       | 14    | 14      | 720       |
|                                 | male   | 547   | 547                | 385       | 197    | 197                | 120       | 368   | 368                | 383       | 12    | 12      | 662       |
| Lung Disease other than Asthma: | female | 181   | 27                 | 665       | 43     | 1                  | 138       | 75    | 14                 | 512       | 9     | 7       | 713       |
|                                 | male   | 55    | 7                  | 378       | 22     | 1                  | 119       | 33    | 4                  | 379       | 20    | 17      | 645       |
| Low Lung Function:              | female | 217   | 63                 | 602       | 54     | 14                 | 124       | 69    | 32                 | 480       | 28    | 23      | 690       |
|                                 | male   | 175   | 39                 | 339       | 56     | 17                 | 102       | 45    | 12                 | 367       | 69    | 60      | 585       |
| CARE Quality Control:           | female | 1     | 1                  | 601       | 16     | 16                 | 108       | 4     | 4                  | 476       | 7     | 7       | 683       |
|                                 | male   | 0     | 0                  | 339       | 18     | 18                 | 84        | 1     | 1                  | 366       | 4     | 4       | 581       |
| Final n:                        | female | 601   |                    |           | 108    |                    |           | 476   |                    |           | 683   |         |           |
|                                 | male   | 339   |                    |           | 84     |                    |           | 366   |                    |           | 581   |         |           |

**Supplemental Table 1: Demographics and exclusion criteria for the control group.** Listed in the first row is the starting number of African American subjects without a diagnosis of asthma (subdivided by gender) that were identified from questionnaire data for each of the 4 parent studies used in this analysis. See methods section and Supplemental Table 6 for further details about the questionnaire data that was used to identify subjects with asthma. Moving down the table, next listed for each study is the exclusion criteria that were applied to arrive at the final n for the control group. Chronic respiratory symptoms were determined from the questionnaire data listed in Supplemental Table 7. Lung disease other than asthma was determined from the questionnaire data listed in Supplemental Table 8. Low lung function was defined as  $FEV_1 < 70\%$  of predicted based on race and sex specific NHANES III prediction equations adjusting for age and height, or  $FEV_1/FVC$  less than lower limits of normal for age, race and sex (see material and methods). CARE quality control metrics were defined previously (Lettre et al. 2011). The "total" column under each parent study refers to the total number of subjects positive for the associated exclusion criterion. The "unique/removed" column under each parent study refers to those subjects who had not been filtered due to the presence of other selection criteria - i.e. this is the number of subjects that were positive only for the one associated selection criterion. The "remaining" column under each parent study refers to the number of subjects remaining after that stage of filtering.

|                                 |        | ARIC    |           | CARDIA  |           | JHS     |           | MESA    |           |     |
|---------------------------------|--------|---------|-----------|---------|-----------|---------|-----------|---------|-----------|-----|
| Initial n:                      | female | 183     |           | 140     |           | 178     |           | 161     |           |     |
|                                 | male   | 90      |           | 70      |           | 92      |           | 67      |           |     |
| Selection Criteria              |        |         |           |         |           |         |           |         |           |     |
|                                 |        | removed | remaining | removed | remaining | removed | remaining | removed | remaining |     |
| Lung Disease Other Than Asthma: | female | 82      | 101       | 30      | 110       | 38      | 140       | 9       | 152       |     |
|                                 | male   | 29      | 61        | 14      | 63        | 11      | 81        | 8       | 59        |     |
| CARE Quality Control:           |        | female  | 2         | 99      | 9         | 101     | 1         | 139     | 2         | 150 |
|                                 |        | male    | 0         | 61      | 7         | 56      | 1         | 80      | 0         | 59  |
| Final n:                        |        | female  | 100       |         | 101       |         | 139       |         | 150       |     |
|                                 |        | male    | 61        |         | 56        |         | 80        |         | 59        |     |

**Supplemental Table 2: Demographics and exclusion criteria for the asthma group.** Listed in the first row is the starting number of African American subjects with asthma (subdivided by gender) that were identified from questionnaire data for each of the 4 parent studies used in this analysis. See methods section and Supplemental Table 6 for further details about the questionnaire data that was used to identify subjects with asthma. Moving down the table, next listed for each study is the exclusion criteria that were applied to arrive at the final n for the asthma group. Lung disease other than asthma was determined from the questionnaire data listed in Supplemental Table 8. CARE quality control metrics were defined previously (Lettre et al. 2011). The "removed" column under each parent study refers to the total number of subjects positive for the associated exclusion criterion. The "remaining" column under each parent study refers to the number of subjects remaining after that stage of filtering.

| Locus                      | Rprtd SNP         | Reference                 | EAF-CARe      | CARe SNP          | Ancestry specific r2 | African Ancestry r2 | EAF          | Pvalue-one tailed | DOE      | I/G      | RSQ          |
|----------------------------|-------------------|---------------------------|---------------|-------------------|----------------------|---------------------|--------------|-------------------|----------|----------|--------------|
| PDE4D                      | rs1588265         | Himes et al. 2009         | 0.7941        | rs4700369         | 0.565054             | 0.0444644           | 0.945        | 1.17E-01          | -        | I        | 0.959        |
| DENND1B                    | rs2786098         | Sleiman et al. 2010       | 0.9032        | rs10922238        | 0.793802             | 0.0310301           | 0.92         | 6.13E-02          | +        | I        | 0.977        |
| <b>RAD50/IL13</b>          | <b>rs2244012</b>  | <b>Moffat et al. 2010</b> | <b>0.5943</b> | <b>rs17622991</b> | <b>0.86971</b>       | <b>0.117662</b>     | <b>0.195</b> | <b>1.07E-05</b>   | <b>+</b> | <b>I</b> | <b>0.950</b> |
| <b>IL1RL1/IL18R1</b>       | <b>rs10173081</b> | <b>Moffat et al. 2010</b> | <b>0.7394</b> | <b>rs17027029</b> | <b>0.773331</b>      | <b>0.511213</b>     | <b>0.688</b> | <b>9.97E-05</b>   | <b>+</b> | <b>I</b> | <b>0.958</b> |
| <b>GSDMB/ORMDL3</b>        | <b>rs2305480</b>  | <b>Moffat et al. 2010</b> | <b>0.8424</b> | <b>rs869402</b>   | <b>0.79411</b>       | <b>0.570927</b>     | <b>0.801</b> | <b>1.25E-04</b>   | <b>+</b> | <b>G</b> | <b>NA</b>    |
| IL33                       | rs1342326         | Moffat et al. 2010        | 0.3463        | rs10975479        | 1                    | 0.122753            | 0.094        | 9.52E-03          | -        | I        | 0.645        |
| RORA                       | rs11071559        | Moffat et al. 2010        | 0.5983        | rs10519068        | 0.955359             | 0.158994            | 0.582        | 2.00E-01          | +        | I        | 0.867        |
| SMAD3                      | rs744910          | Moffat et al. 2010        | 0.6621        | rs12708492        | 0.76813              | 0.447359            | 0.444        | 6.79E-01          | +        | G        | NA           |
| IL2RB                      | rs2284033         | Moffat et al. 2010        | 0.5988        | rs228954          | 0.936749             | 0.0940429           | 0.574        | 9.54E-01          | +        | I        | 0.829        |
| IL6R                       | rs4129267         | Ferreira et al. 2011      | 0.1322        | rs4133213         | 0.785035             | 0.331899            | 0.217        | 1.88E-01          | +        | I        | 0.738        |
| 11q13.5 (C11orf30-LRRC32)  | rs7130588         | Ferreira et al. 2011      | 0.2085        | rs61894512        | 0.555977             | 0.281153            | 0.199        | 9.97E-01          | +        | I        | 0.954        |
| <b>10p14 (gene desert)</b> | <b>rs10508372</b> | <b>Hirota et al. 2011</b> | <b>0.8016</b> | <b>rs11255975</b> | <b>0.985498</b>      | <b>0.793969</b>     | <b>0.777</b> | <b>8.49E-04</b>   | <b>+</b> | <b>I</b> | <b>0.972</b> |
| 4q31 (USP38)               | rs7686660         | Hirota et al. 2011        | 0.5672        | rs11735113        | 0.942907             | 0.0931479           | 0.247        | 3.37E-02          | -        | I        | 0.988        |
| 5q22 (TSLP-WDR36)          | rs1837253         | Hirota et al. 2011        | 0.7319        | Same SNP          | -                    | -                   | 0.732        | -                 | +        | I        | 0.990        |
| 6p21 (HLA/NOTCH4)          | rs404860          | Hirota et al. 2011        | 0.2835        | rs2256594         | 0.791158             | 1                   | 0.284        | 9.11E-02          | +        | I        | 0.975        |
| 12q13 (IKZF4/EOS)          | rs1701704         | Hirota et al. 2011        | 0.1295        | rs7955865         | 0.838692             | 0.838692            | 0.464        | 9.38E-02          | +        | I        | 0.903        |
| HLA-DP                     | rs987870          | Noguchi et al. 2011       | 0.6794        | rs4947357         | 0.538114             | 0                   | 0.987        | 9.44E-01          | +        | I        | 0.829        |
| PYHIN1                     | rs1102000         | Torgerson et al. 2011     | 0.7544        | rs1102000         | 0.550829             | -                   | 0.272        | 9.08E-01          | +        | I        | 0.790        |
| DPP10                      | rs1435879         | Mathias et al. 2010       | 0.9298        | Same SNP          | -                    | -                   | 0.93         | -                 | +        | I        | 0.995        |
| ADRA1B                     | rs10515807        | Mathias et al. 2010       | 0.0563        | rs35591745        | 0.83105              | same                | 0.05         | 2.34E-01          | +        | I        | 0.930        |
| PRNP                       | rs6052761         | Mathias et al. 2010       | 0.3182        | rs6052762         | 0.765314             | same                | 0.241        | 2.22E-01          | -        | I        | 0.871        |

**Supplemental Table 3: Replication of European asthma associated SNPs in the CARe African-American meta-analyses.** Reported SNP refers to the top SNP at the particular locus from the referenced GWA studies, and CARe SNP refers the top SNP in the CARe African American cohort. EAF-CARe is the effect allele frequency for the reported SNP in CARe. EAF is the effect allele frequency for the "better" SNP (i.e. the SNP with the strongest signal of replication) in CARe that was found in the analysis. DOE (direction of effect): + indicates that the CARe SNP effect was in the same direction as the reported SNP. I/G indicates whether the CARe SNP was imputed (I) or genotyped (G). RSQ, imputation r2 for imputed CARe SNPs. Bold is used to indicate CARe SNPs that either exceeded the Bonferoni corrected significance threshold or were nominally significant and in the same effect direction as the reported SNP.

| Locus               | Reported SNP | Reference          | EAF-CARe | CARe SNP   | Anestry specific r2 | African Ancestry r2 | EAF   | Pvalue-one tailed | Pvalue (local ancestry) | Effect Direction |
|---------------------|--------------|--------------------|----------|------------|---------------------|---------------------|-------|-------------------|-------------------------|------------------|
| RAD50/IL13          | rs2244012    | Moffat et al. 2010 | 0.5943   | rs17622991 | 0.86971             | 0.117662            | 0.195 | 1.07E-05          | 1.50E-05                | +                |
| IL1RL1/IL18R1       | rs10173081   | Moffat et al. 2010 | 0.7394   | rs17027029 | 0.773331            | 0.511213            | 0.688 | 9.97E-05          | 1.18E-04                | +                |
| GSDMB/ORMDL3        | rs2305480    | Moffat et al. 2010 | 0.8424   | rs869402   | 0.79411             | 0.570927            | 0.801 | 1.25E-04          | 1.36E-04                | +                |
| 10p14 (gene desert) | rs10508372   | Hirota et al. 2011 | 0.8016   | rs11255975 | 0.985498            | 0.793969            | 0.777 | 8.49E-04          | 1.01E-03                | +                |

**Supplemental Table 4: Adjustment of meta-analysis results for local ancestry.** Reported SNP refers to the top SNP at the particular locus from the referenced GWA studies, and CARe SNP refers the top SNP in the CARe African American cohort. EAF-CARe is the effect allele frequency for the reported SNP in CARe. EAF is the effect allele frequency for the "better" SNP (i.e. the SNP with the strongest signal of replication) in CARe that was found in the analysis. P-value (local ancestry) is the p-value reported in table 2 adjusted for the confounding effects of admixture by using HAPMIX software. Effect direction: + indicates that the CARe SNP effect was in the same direction as the reported SNP. Bold is used to indicate CARe SNPs that exceeded the Bonferoni corrected significance threshold.

| Locus         | MarkerName | Allele1 | Allele2 | Freq1  | FreqSE | MinFreq | MaxFreq | Zscore | P-value         |
|---------------|------------|---------|---------|--------|--------|---------|---------|--------|-----------------|
| RAD50/IL13    | rs2244012  | a       | g       | 0.4062 | 0.007  | 0.3958  | 0.416   | -1.337 | 0.1811          |
| RAD50/IL13    | rs17622991 | a       | g       | 0.1958 | 0.0098 | 0.1765  | 0.2052  | 3.624  | <b>2.90E-04</b> |
| IL1RL1/IL18R1 | rs10173081 | t       | c       | 0.2613 | 0.0034 | 0.2558  | 0.2658  | -0.674 | 0.5006          |
| IL1RL1/IL18R1 | rs17027029 | c       | g       | 0.3125 | 0.004  | 0.3056  | 0.3182  | -1.836 | 0.06639         |

**Supplemental Table 5: Conditional analysis of signals in the *RAD50/IL13* region and the *IL1RL1/IL18R1* region.** Conditioning for the effect of rs17622991 eliminated evidence for association for rs224012. However, conditioning for the effect of rs224012 did not abolish the association signal of rs17622991. Conditional analysis of the signals in *IL1RL1/IL18R1* did not distinguish the signal at the European ancestry SNP from the signal at the African ancestry SNP.

| Study  | Variable | Question                                                            |
|--------|----------|---------------------------------------------------------------------|
| ARIC   | HHXB05F  | asthma diagnosed by a doctor                                        |
| ARIC   | HOM10H   | asthma ever diagnosed                                               |
| ARIC   | PHXA8M   | has a doctor said you had asthma                                    |
| ARIC   | PHXB6E   | ever told asthma                                                    |
| ARIC   | RPAA35   | ever had asthma                                                     |
| ARIC   | RPAA36   | doctor confirmed asthma                                             |
| CARDIA | A08asma  | do you take meds for asthma or other breathing problem (year 1)     |
| CARDIA | A12ASDOC | was asthma confirmed by a doctor (year 1)                           |
| CARDIA | A12ASTHM | have you ever had asthma (year 1)                                   |
| CARDIA | B08ASMA  | do you take meds for asthma or other breathing problem (year 2)     |
| CARDIA | B12ASDOC | was asthma confirmed by a doctor (year 2)                           |
| CARDIA | B12ASTHM | have you ever had asthma (year 2)                                   |
| CARDIA | C08ASMA  | are you taking meds for asthma or other breathing problem (year 5)  |
| CARDIA | D08asma  | are you taking meds for asthma or other breathing problem (year 7)  |
| CARDIA | D08asth  | has a doctor or nurse ever said you had asthma (year 7)             |
| CARDIA | E08asma  | are you taking meds for asthma or other breathing problem (year 10) |
| CARDIA | E08asth  | has a doctor or nurse ever said you had asthma (year 10)            |
| CARDIA | F08ASTH  | has a doctor or nurse ever said you had asthma (year 15)            |
| CARDIA | Y01ASTDR | asthma based on physician diagnosis                                 |
| JHS    | AFUA7h   | has a doctor ever told you that you have asthma (exam 1 follow up)  |
| JHS    | AFUB7h   | has a doctor ever told you that you have asthma (exam 1 follow up)  |
| JHS    | AFUI7H   | has a doctor ever told you that you have asthma (exam 1 follow up)  |
| JHS    | AFUJ7H   | has a doctor ever told you that you have asthma (exam 1 follow up)  |
| JHS    | AFUK7H   | has a doctor ever told you that you have asthma (exam 1 follow up)  |
| JHS    | AFUC20   | has a doctor ever told you that you have asthma (exam 2 follow up)  |
| JHS    | PFHA10A  | has a doctor ever told you that you have asthma                     |
| JHS    | RPAA13   | have you ever had asthma                                            |
| MESA   | ASTHMA1  | asthma (self report) (exam 1)                                       |
| MESA   | ASTHMA2  | asthma (self report) (exam 2)                                       |
| MESA   | ASTHMA3  | asthma (self report) (exam 3)                                       |
| MESA   | ASTHMA4  | asthma (self report) (exam 4)                                       |

**Supplemental Table 6: Questionnaire questions to establish asthma diagnosis.** Subjects with asthma were defined based on an affirmative response to any of these study questions and included both physician-diagnosed and self-reported asthma.

| Study  | Variable | Question                                                    |
|--------|----------|-------------------------------------------------------------|
| ARIC   | RPAA01   | usually have cough                                          |
| ARIC   | RPAA13   | chest wheeze or whistle with a cold                         |
| ARIC   | RPAA14   | chest wheeze or whistle otherwise                           |
| ARIC   | RPAA17   | ever had wheeze with SOB                                    |
| ARIC   | RPAB01   | usually have cough                                          |
| ARIC   | RPAB03   | 3 consecutive months of cough                               |
| ARIC   | RPAB06   | phlegm on most days for 3 months out of the year            |
| ARIC   | RPAB07   | chest wheeze or whistle with a cold                         |
| ARIC   | RPAB08   | chest wheeze or whistle otherwise                           |
| ARIC   | RPAB10   | ever had wheeze with SOB                                    |
| CARDIA | A12COLD  | chest sound wheezy with a cold (year 1)                     |
| CARDIA | A12CONSC | cough for 3 consecutive months or more (year 1)             |
| CARDIA | A12EPISD | periods of cough lasting 3 weeks or more each year (year 1) |
| CARDIA | A12NCOLD | chest sound wheezy apart from colds (year 1)                |
| CARDIA | A12PCONS | phlegm for 3 consecutive months during the year (year 1)    |
| CARDIA | A12SHTBR | ever had wheeze with SOB (year 1)                           |
| CARDIA | A12USUAL | usually have a cough (year 1)                               |
| CARDIA | B12COLD  | chest sound wheezy with colds (year 2)                      |
| CARDIA | B12CONSC | cough for 3 consecutive months or more (year 2)             |
| CARDIA | B12NCOLD | chest sound wheezy apart from colds (year 2)                |
| CARDIA | B12PCONS | phlegm for 3 consecutive months during the year (year 2)    |
| CARDIA | B12SHTBR | ever had wheeze with SOB (year 2)                           |
| CARDIA | B12USUAL | usually have a cough (year 2)                               |
| CARDIA | E12COLD  | wheeze with colds (year 10)                                 |
| CARDIA | E12CONSC | cough for 3 consecutive months or more (year 10)            |
| CARDIA | E12NCOLD | wheeze apart from colds (year 10)                           |
| CARDIA | E12PCONS | phlegm for 3 consecutive months during the year (year 10)   |
| CARDIA | E12SHTBR | ever had wheeze with SOB (year 10)                          |
| CARDIA | E12USUAL | usually have a cough (year 10)                              |
| CARDIA | F12COLD  | wheeze with colds (year 15)                                 |
| CARDIA | F12NCOLD | wheeze apart from colds (year 15)                           |
| CARDIA | F12SHTBR | ever had wheeze with SOB (year 15)                          |
| JHS    | AFUC19G  | usually have some cough or wheezing                         |
| JHS    | RPAA1    | usually have cough                                          |
| JHS    | RPAA10   | attacks of wheezing that have made you SOB                  |
| JHS    | RPAA3    | cough most days for 3 consecutive months                    |
| JHS    | RPAA6    | phlegm most days for 3 consecutive months                   |
| JHS    | RPAA7    | wheezing with respiratory infections                        |
| JHS    | RPAA8    | wheezing apart from a cold                                  |

**Supplemental Table 7: Questionnaire questions to determine history of chronic respiratory symptoms.** These symptoms could be consistent with asthma, and so subjects who provided an affirmative answer to these questions were excluded from the control group.

| Study  | Variable | Question                                                                             |
|--------|----------|--------------------------------------------------------------------------------------|
| ARIC   | HOM10G   | chronic lung disease ever diagnosed                                                  |
| ARIC   | PHXA8L   | chronic lung disease                                                                 |
| ARIC   | PHXB6D   | Chronic lung disease, such as bronchitis, or emphysema                               |
| ARIC   | RPAA27   | ever had chronic bronchitis                                                          |
| ARIC   | RPAA28   | still have chronic bronchitis                                                        |
| ARIC   | RPAA29   | doctor confirmed chronic bronchitis                                                  |
| ARIC   | RPAA31   | ever had emphysema                                                                   |
| ARIC   | RPAA32   | still have emphysema                                                                 |
| ARIC   | RPAA33   | doctor confirmed emphysema                                                           |
| CARDIA | A12CBDOC | chronic bronchitis confirmed by doctor (year 1)                                      |
| CARDIA | A12CBRON | ever had chronic bronchitis (year 1)                                                 |
| CARDIA | A12CBSTL | still have chronic bronchitis (year 1)                                               |
| CARDIA | A12EMDOC | doctor confirmed emphysema (year 1)                                                  |
| CARDIA | A12EMPH  | ever had emphysema (year 1)                                                          |
| CARDIA | A12EMSTL | still have emphysema (year 1)                                                        |
| CARDIA | D08BRON  | chronic bronchitis (year 7)                                                          |
| CARDIA | D08EMPH  | emphysema (year 7)                                                                   |
| CARDIA | E08BRON  | chronic bronchitis (year 10)                                                         |
| CARDIA | E08EMPH  | emphysema (year 10)                                                                  |
| CARDIA | F08BRON  | chronic bronchitis (year 15)                                                         |
| CARDIA | F08EMPH  | emphysema (year 15)                                                                  |
| CARDIA | F08EMPYR | emphysema in the past year (year 15)                                                 |
| JHS    | AFUA7G   | Chronic lung disease such as bronchitis or emphysema (exam 1 follow up)              |
| JHS    | AFUB7G   | Chronic lung disease such as bronchitis or emphysema (exam 1 follow up)              |
| JHS    | AFUC18A  | doctor said chronic lung disease, such as bronchitis or emphysema (exam 2 follow up) |
| MESA   | EMPHYS1  | Emphysema, self report (exam 1)                                                      |
| MESA   | EMPHYS2  | Emphysema, self report (exam 2)                                                      |
| MESA   | EMPHYS3  | Emphysema, self report (exam 3)                                                      |
| MESA   | EMPHYS4  | Emphysema, self report (exam 4)                                                      |
| SHHS   | COPD15   | MD said pt had COPD                                                                  |
| SHHS   | CRBRON15 | MD said pt had chronic bronchitis                                                    |
| SHHS   | EMPHYS15 | MD said pt had emphysema                                                             |
| SHHS   | hi201a   | doctor ever told you that you have emphysema                                         |
| SHHS   | hi201b   | doctor ever told you that you have chronic bronchitis?                               |
| SHHS   | hi201c   | doctor ever told you that you have COPD?                                             |

**Supplemental Table 8: Questionnaire questions to establish diagnoses consistent with chronic lung disease.** Subjects who provided an affirmative answer to these questions were excluded from both the asthma group and the control group.



|                        | Asthma       | COPD          | P-value |
|------------------------|--------------|---------------|---------|
| <b>Allergic Status</b> |              |               |         |
| w/o allergies          | 117          | 308           | <0.001  |
| with allergies         | 44           | 39            |         |
| <b>Lung Function</b>   |              |               |         |
| normal lung function   | 142          | 52            | <0.001  |
| low lung function      | 19           | 292           |         |
| <b>Smoking Status</b>  |              |               |         |
| never smoker           | 76           | 97            | <0.001  |
| ever smoker            | 83           | 247           |         |
| <b>Age</b>             |              |               |         |
| median +/- SD          | 53.5 +/- 5.9 | 56.50 +/- 5.7 | <0.001  |

**Supplemental Table 9: Comparison of phenotypic variables between subjects with self-reported asthma or self-reported COPD in ARIC.** Key variables that distinguish patients with asthma from patients with COPD (allergic status, lung function, smoking status, and age) were compared in order to determine if the asthma subjects identified in ARIC were phenotypically distinct from the COPD subjects identified in ARIC. P-values are determined with Chi-Square or Fisher's exact test, where appropriate. Taken together, these results argue that our method of defining asthma by self-report combined with the exclusion of those with self-reported COPD successfully allowed us to isolate a cohort of asthmatics that was phenotypically distinct from subjects with COPD in ARIC.

|                        | Asthma      | COPD        | P-value |
|------------------------|-------------|-------------|---------|
| <b>Allergic Status</b> |             |             |         |
| w/o allergies          | 71          | 76          | <0.001  |
| with allergies         | 86          | 33          |         |
| <b>Lung Function</b>   |             |             |         |
| normal lung function   | 122         | 74          | 0.045   |
| low lung function      | 33          | 33          |         |
| <b>Smoking Status</b>  |             |             |         |
| never smoker           | 80          | 49          | > 0.05  |
| ever smoker            | 61          | 60          |         |
| <b>Age</b>             |             |             |         |
| median +/- SD          | 40 +/- 3.63 | 40 +/- 3.74 | > 0.05  |

**Supplemental Table 10: Comparison of phenotypic variables between subjects with self-reported asthma or self-reported COPD in CARDIA.** Key variables that distinguish patients with asthma from patients with COPD (allergic status, lung function, smoking status, and age) were compared in order to determine if the asthma subjects identified in CARDIA were phenotypically distinct from the COPD subjects identified in CARDIA. P-values are determined with Chi-Square or Fisher's exact test, where appropriate. Taken together, these results argue that our method of defining asthma by self-report combined with the exclusion of those with self-reported COPD successfully allowed us to isolate a cohort of asthmatics that was phenotypically distinct from subjects with COPD in CARDIA.

|                        | Asthma      | COPD        | P-value |
|------------------------|-------------|-------------|---------|
| <b>Allergic Status</b> |             |             |         |
| w/o allergies          | n/a         | n/a         | n/a     |
| with allergies         | n/a         | n/a         |         |
| <b>Lung Function</b>   |             |             |         |
| normal lung function   | 198         | 141         | > 0.05  |
| low lung function      | 18          | 11          |         |
| <b>Smoking Status</b>  |             |             |         |
| never smoker           | 141         | 80          | 0.038   |
| ever smoker            | 73          | 66          |         |
| <b>Age</b>             |             |             |         |
| median +/- SD          | 51 +/- 12.6 | 55 +/- 12.3 | > 0.05  |

**Supplemental Table 11: Comparison of phenotypic variables between subjects with self-reported asthma or self-reported COPD in JHS.** Key variables that distinguish patients with asthma from patients with COPD (lung function, smoking status, and age) were compared in order to determine if the asthma subjects identified in JHS were phenotypically distinct from the COPD subjects identified in JHS. P-values are determined with Chi-Square or Fisher's exact test, where appropriate. Taken together, these results argue that our method of defining asthma by self-report combined with the exclusion of those with self-reported COPD successfully allowed us to isolate a cohort of asthmatics that was phenotypically distinct from subjects with COPD in JHS.

|                        | Asthma      | COPD        | P-value |
|------------------------|-------------|-------------|---------|
| <b>Allergic Status</b> |             |             |         |
| w/o allergies          | 127         | 10          | < 0.001 |
| with allergies         | 82          | 36          |         |
| <b>Lung Function</b>   |             |             |         |
| normal lung function   | 189         | 36          | 0.004   |
| low lung function      | 19          | 8           |         |
| <b>Smoking Status</b>  |             |             |         |
| never smoker           | 100         | 5           | < 0.001 |
| ever smoker            | 104         | 39          |         |
| <b>Age</b>             |             |             |         |
| median +/- SD          | 59 +/- 10.2 | 67 +/- 10.0 | < 0.001 |

**Supplemental Table 12: Comparison of phenotypic variables between subjects with self-reported asthma or self-reported COPD in MESA.** Key variables that distinguish patients with asthma from patients with COPD (allergic status, lung function, smoking status, and age) were compared in order to determine if the asthma subjects identified in MESA were phenotypically distinct from the COPD subjects identified in MESA. P-values are determined with Chi-Square or Fisher's exact test, where appropriate. Taken together, these results argue that our method of defining asthma by self-report combined with the exclusion of those with self-reported COPD successfully allowed us to isolate a cohort of asthmatics that was phenotypically distinct from subjects with COPD in MESA.

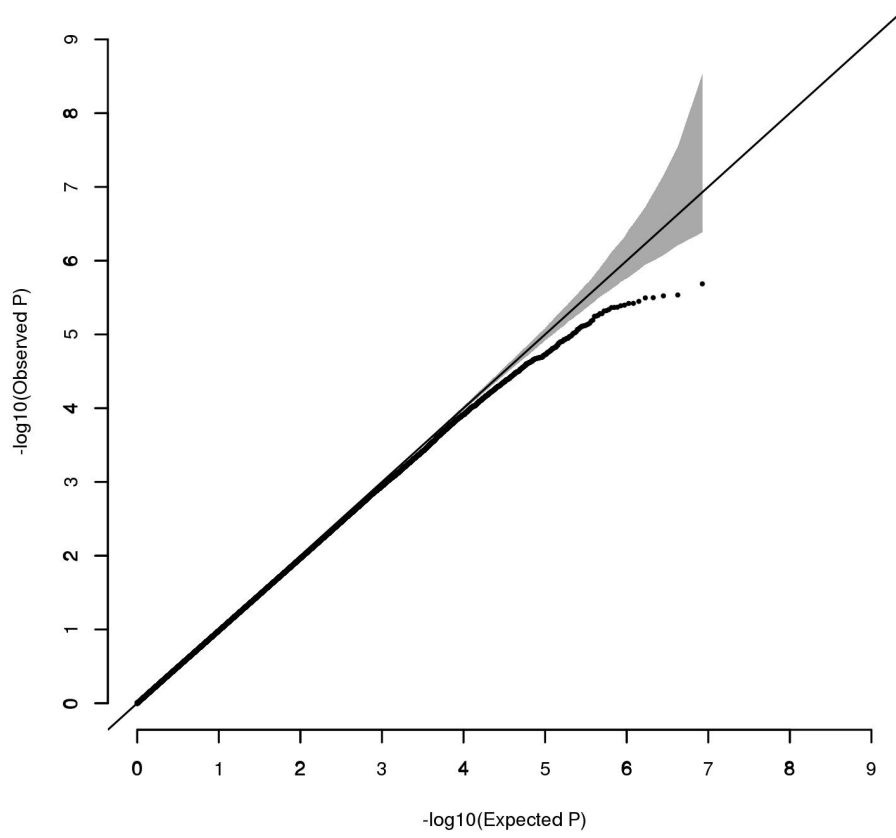

Supplemental Figure 1

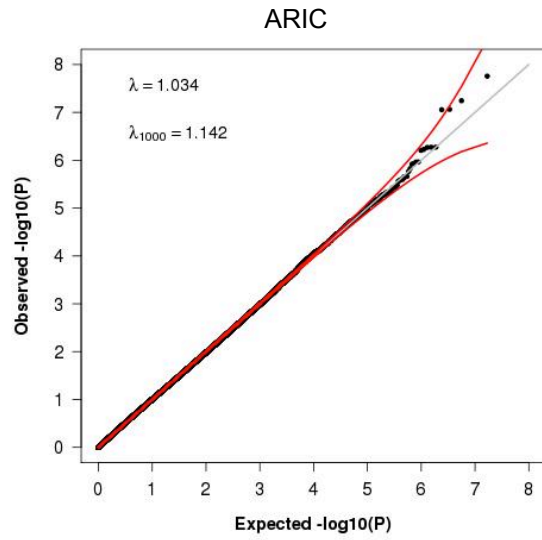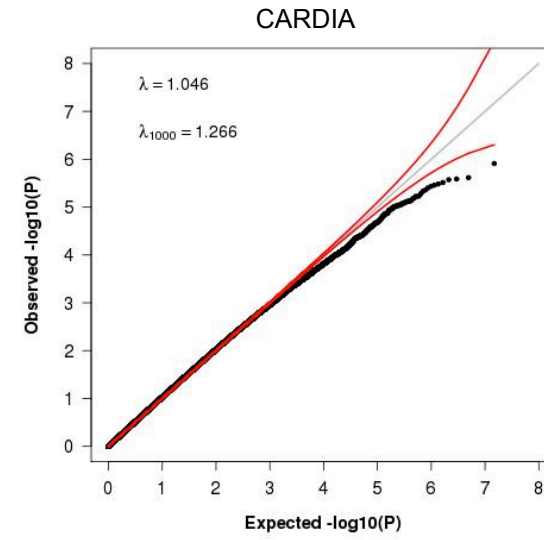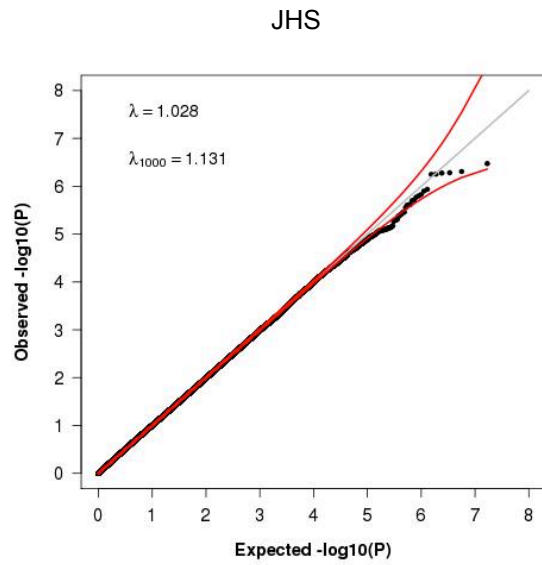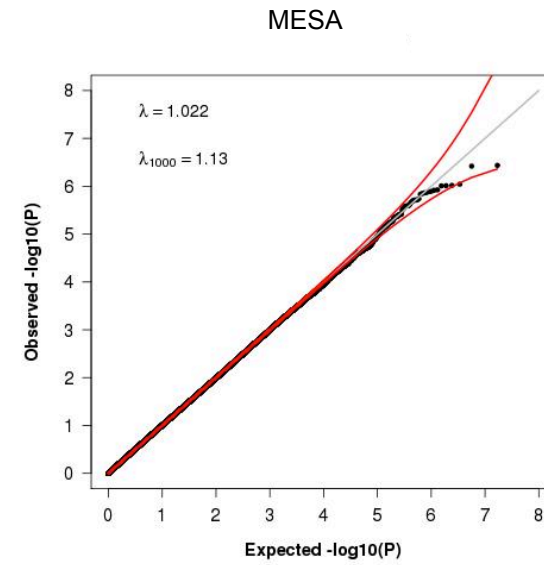

Supplemental Figure 2

## A GSDMB/ORMDL3 African Signal

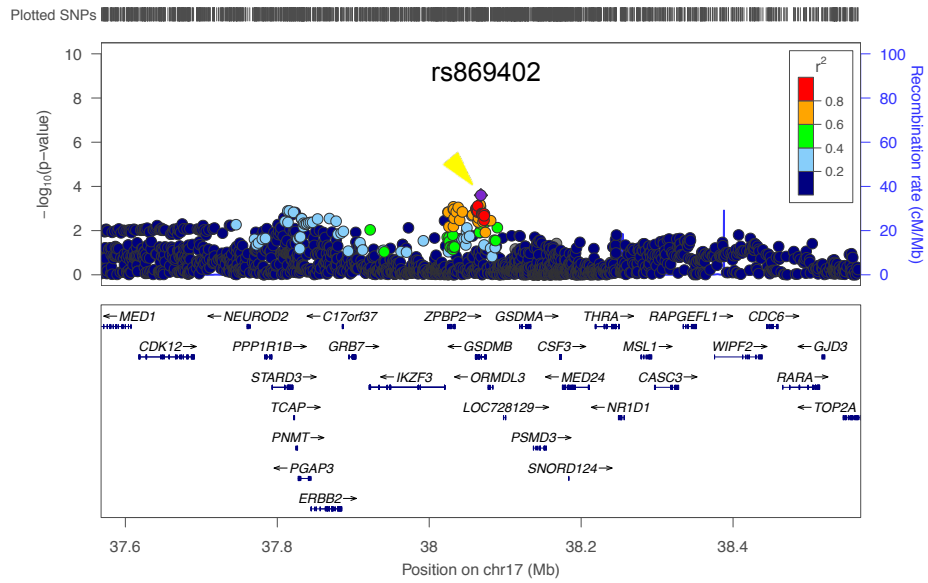

## B GSDMB/ORMDL3 European Signal

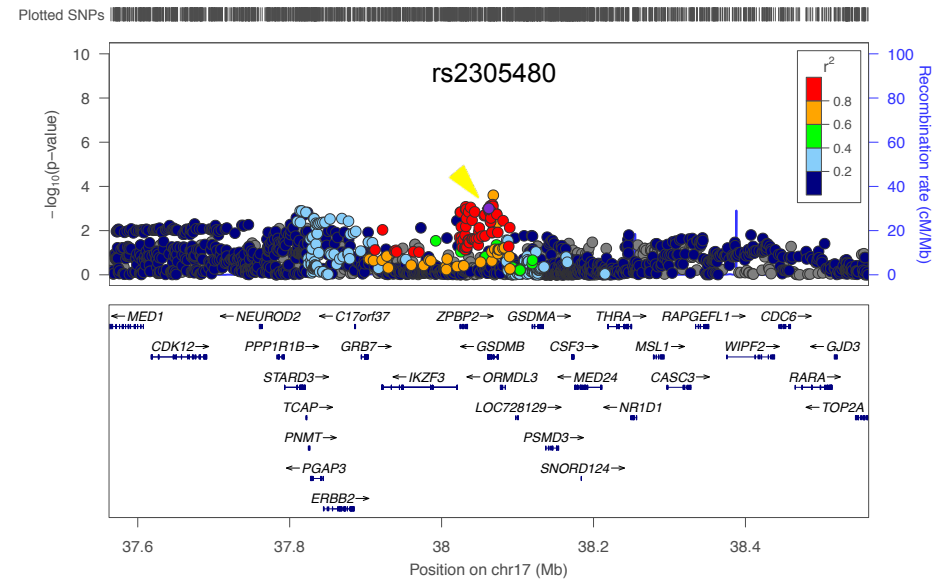

Supplement: NIHMS497079-supplement-01.pdf [file NIHMS497079-supplement-01.pdf]
